# Supplementary material
Source: publisher figshare collection journal article supplement (https://acs.figshare.com/ndownloader/files/4794436)
Supplement: Supplementary file 1 [file 4794436]

# Supporting Information for: Fundamental Limits on the Subthreshold Slope in Schottky Source/Drain Black Phosphorus Field-Effect Transistors

Nazila Haratipour, Seon Namgung, Sang-Hyun Oh, and Steven J. Koester\*

*Department of Electrical and Computer Engineering, University of Minnesota,*

*200 Union Street SE, Minneapolis, Minnesota 55455, United States*

*\* Address correspondence to: [skoester@umn.edu](mailto:skoester@umn.edu)*

## Device Fabrication Process

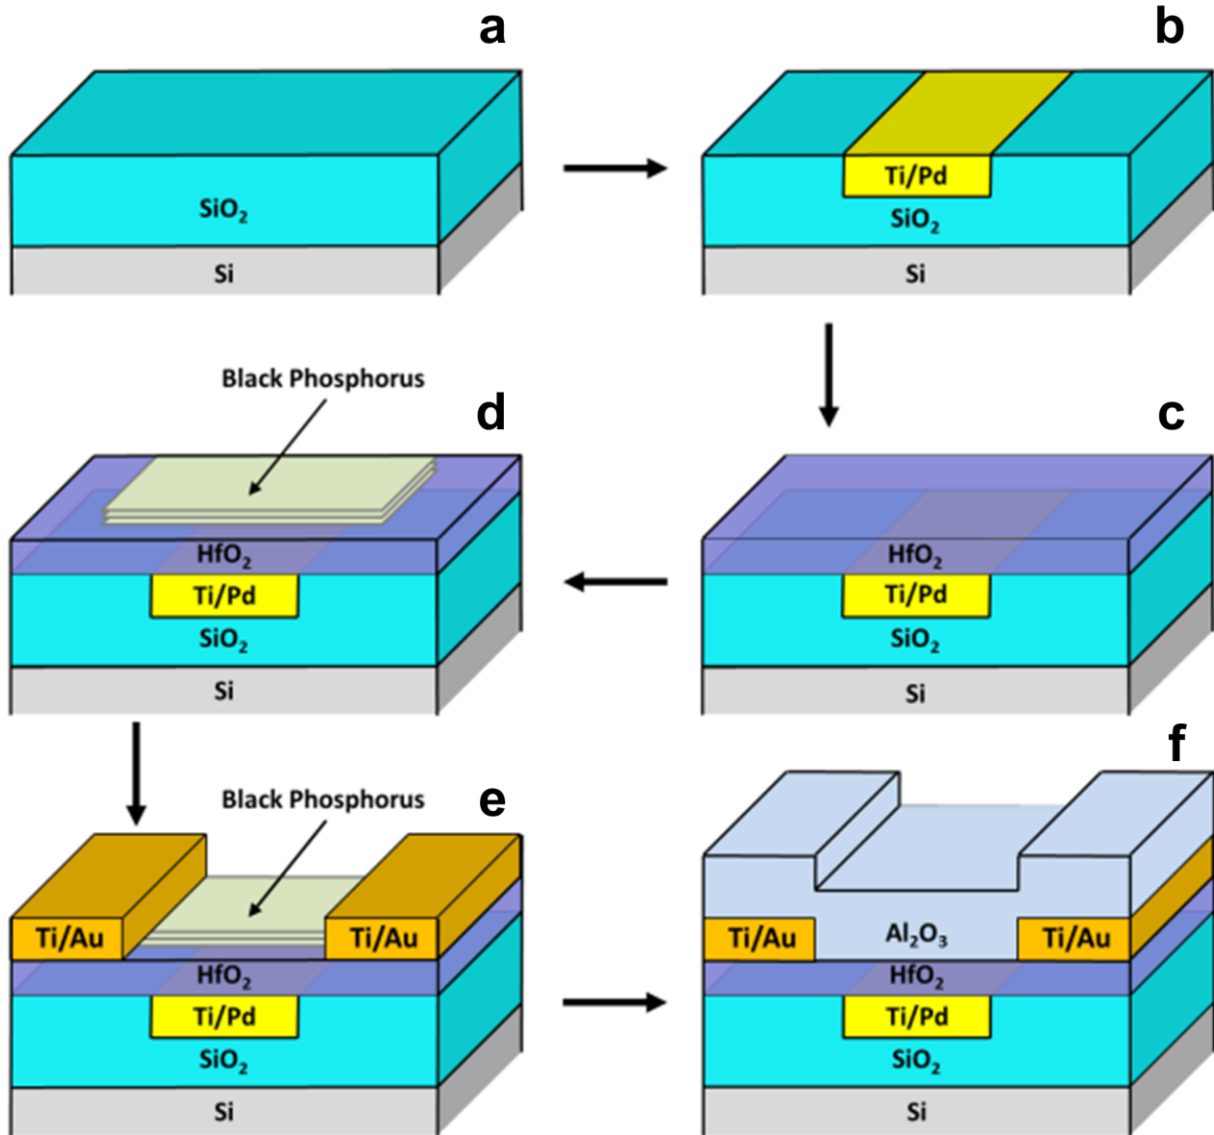

Figure S1. Fabrication sequence for BP MOSFETs. (a) Si/ $\text{SiO}_2$  starting substrate, (b) local back gate formation, (c) ALD  $\text{HfO}_2$  deposition, (d) black phosphorus alignment and transfer, (e) source and drain contact formation, (f) ALD  $\text{Al}_2\text{O}_3$  passivation layer deposition.

## Optical Micrographs of Additional Devices

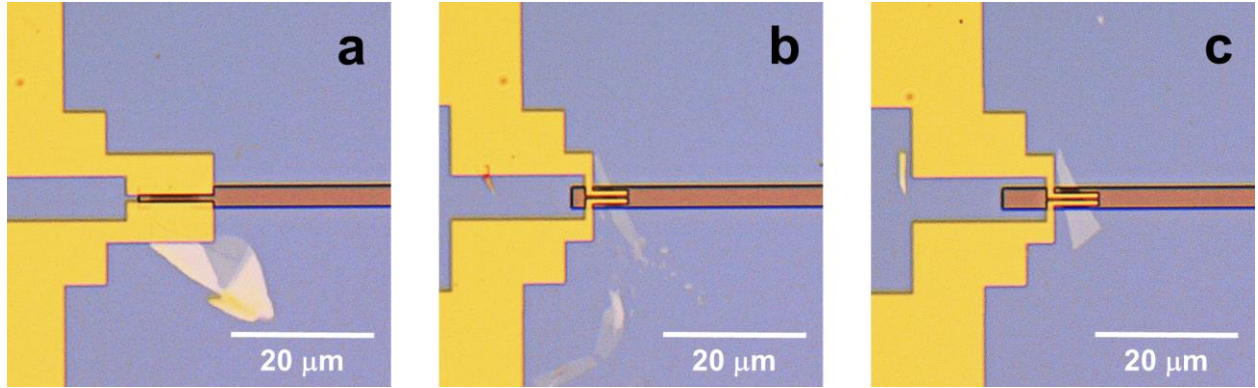

Figure S2. Optical micrographs of several completed BP MOSFETs. (a) Device #2 with BP thickness (in the active device region),  $t_{BP}$  of 4.3 nm. The device width,  $W_g$  was 7.15  $\mu\text{m}$  and the source-to-drain spacing, which defined the effective gate length,  $L_{eff}$  was 1.0  $\mu\text{m}$ . (b) Device #3 with  $t_{BP} = 4.5$  nm,  $W_g = 2.00$   $\mu\text{m}$  and  $L_{eff} = 0.4$   $\mu\text{m}$ , and (c) Device #7 with  $t_{BP} = 8.1$  nm,  $W_g = 3.16$   $\mu\text{m}$  and  $L_{eff} = 0.30$   $\mu\text{m}$ .

## Black Phosphorus Raman and Reflectance Characterization

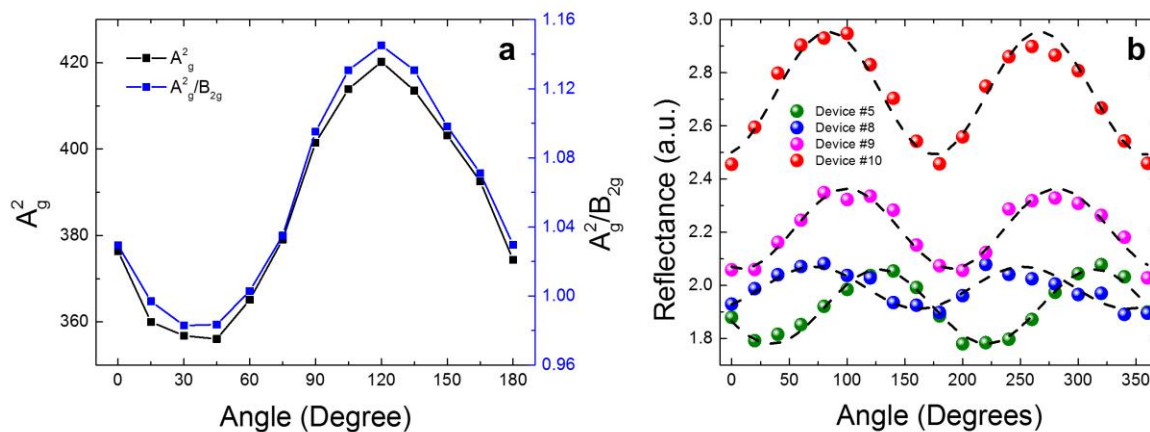

Figure S3. (a) Angular dependence of the Raman  $A_g^2$  mode (left axis) and  $A_g^2/B_{2g}$  (right axis) for a typical BP flake. The peak intensity is the direction that the laser polarization is along the armchair (low mass) direction. (b) Reflectance intensity as a function of rotational angle for devices #5, 8, 9, and 10. The maximum peak intensity indicates the zigzag direction (high mass). Dashed lines shows the sinusoidal fit of the reflectance data.

## Double Sweep Transfer Characteristics

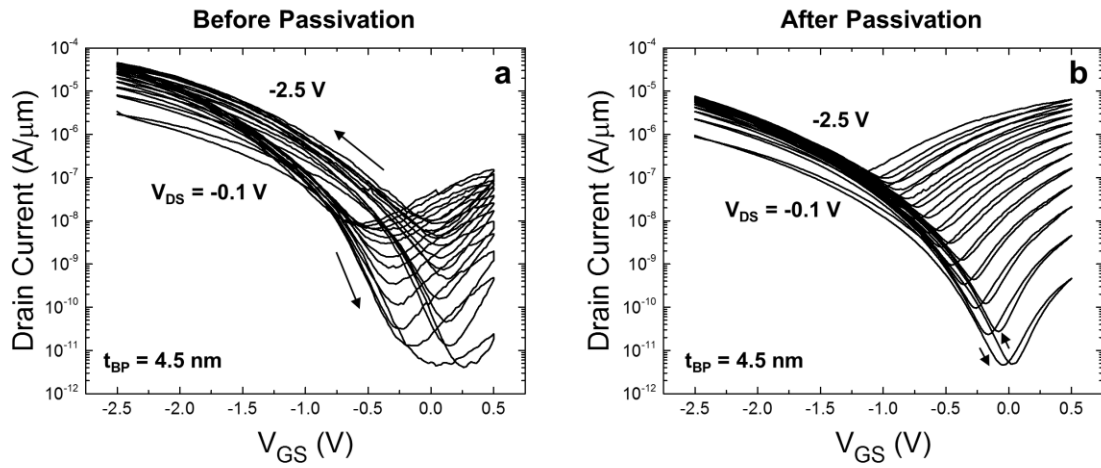

Figure S4. Double sweep transfer characteristic of device #3 (a) before and (b) after passivation for values of  $V_{DS} = -0.1$  to  $-2.5$  V in  $-0.2$  V steps. Possible causes for the hysteresis include charge trapping in the  $\text{HfO}_2$  gate dielectric, moisture trapped underneath the BP, and/or surface oxide layers on top of the BP. The hysteresis was greatly reduced after passivation, which we attribute to moisture desorption during the passivation layer deposition step at  $200^\circ\text{C}$ .

## Output and Transfer Characteristics

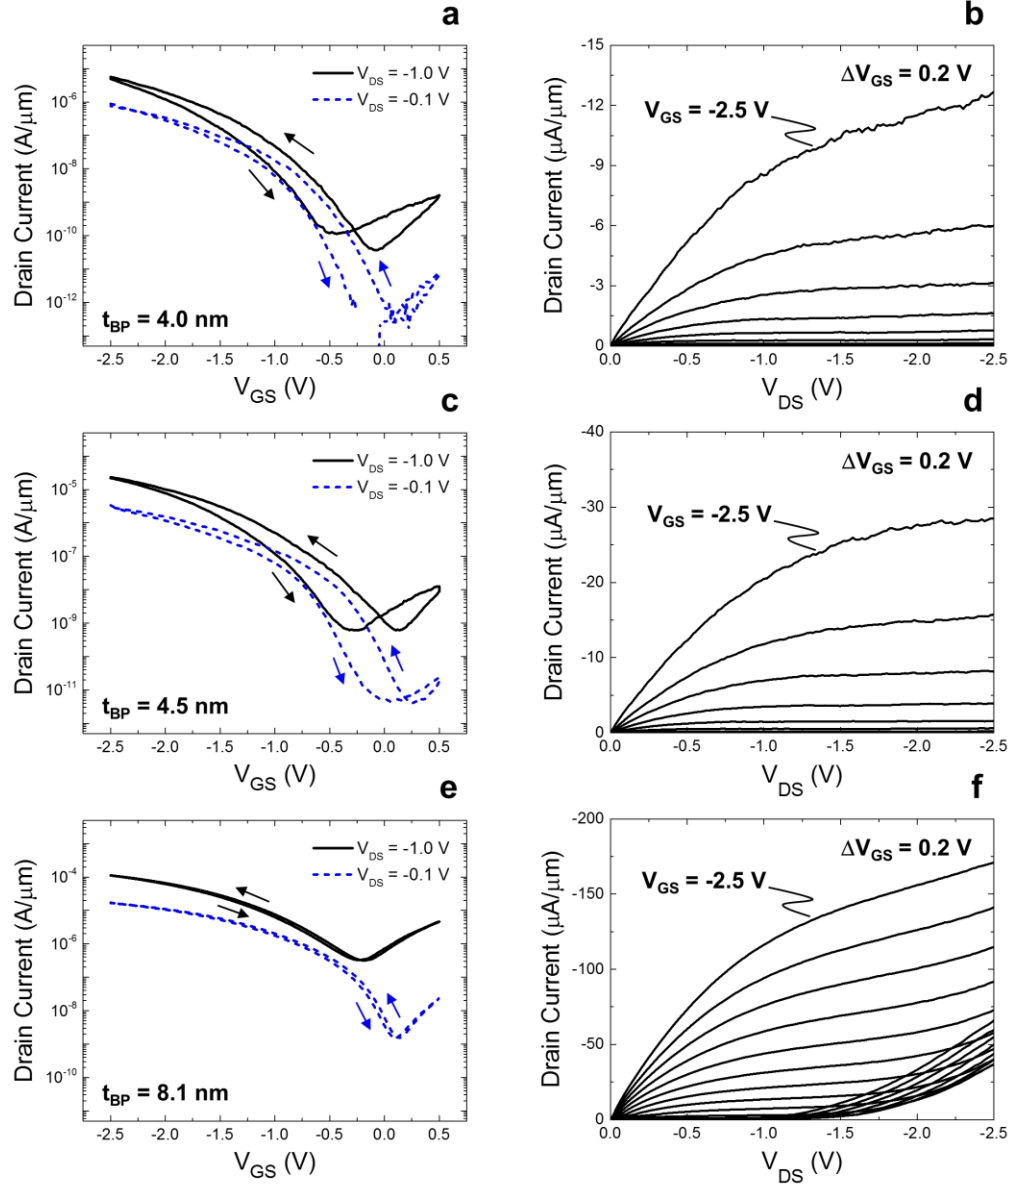

Figure S5. Room-temperature current-voltage characteristics of (a)-(b) device #1 ( $t_{BP} = 4.0$  nm) before passivation, (c)-(d) device #3 ( $t_{BP} = 4.5$  nm) before passivation, and (e)-(f) device #7 ( $t_{BP} = 8.1$  nm), after passivation. (a), (c) and (e) are plots of drain current,  $I_D$ , vs. gate-to-source voltage,  $V_{GS}$ , for both forward and reverse sweep directions at drain-to-source voltage,  $V_{DS} = -0.1$  V (blue) and  $-1.0$  V (black). (b), (d) and (f) show plots of  $I_D$  vs.  $V_{DS}$  for the same devices where the top curves are at  $V_{GS} = -2.5$  V and the gate voltage step,  $\Delta V_{GS} = +0.2$  V.

## Black Phosphorus Stability Analysis

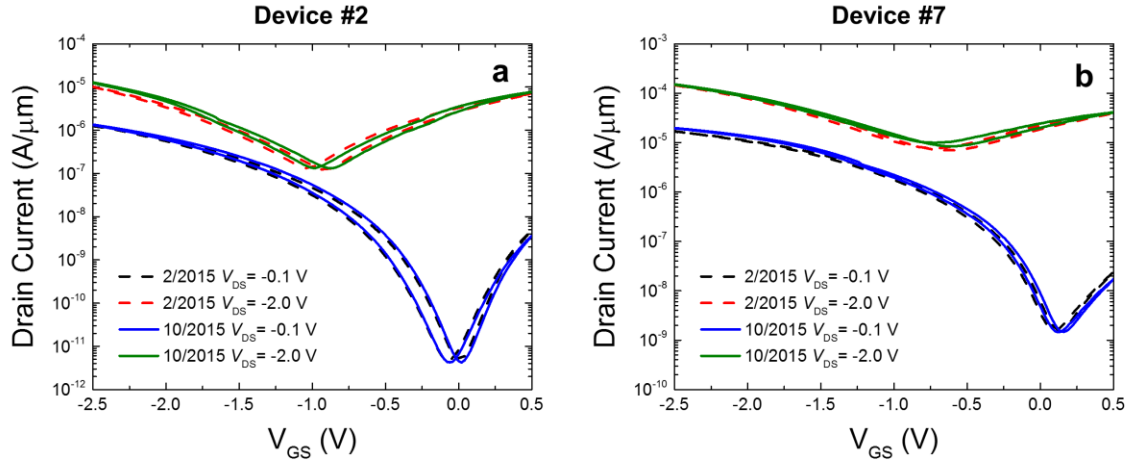

Figure S6. Comparison between the initial  $I_D$  vs.  $V_{GS}$  characteristic of (a) device #2 and (b) device #7 immediately after passivation (in 2/2015) and the characteristics after  $\sim 8$  months (in 10/2015). The devices were stored in a nitrogen purged dry box, but were exposed to air occasionally for characterization periodically during this time. Before the measurements shown on 10/2015, the devices were first baked at  $200^\circ\text{C}$  for 30 minutes. As shown in the figure, the threshold voltage and basic characteristics were completely retained, both at low and high values of  $V_{DS}$ . These results demonstrate the potential for long-term stability in black phosphorus MOSFETs passivated with  $\text{Al}_2\text{O}_3$ .
